# Supplementary material for: Electronic properties of the coronene series from thermally-assisted-occupation density functional theory
Source: PubMed Central journal article supplement (PMC9087050; doi:10.1039/c8ra01336e), 2018-10-08
Supplement: RA-008-C8RA01336E-s001.pdf [file RA-008-C8RA01336E-s001.pdf]

# Supplementary Material to: Electronic Properties of the Coronene Series from Thermally-Assisted-Occupation Density Functional Theory

Chia-Nan Yeh,<sup>1</sup> Can Wu,<sup>2</sup> Haibin Su,<sup>2,3,\*</sup> and Jeng-Da Chai<sup>1,4,5,†</sup>

<sup>1</sup>*Department of Physics, National Taiwan University, Taipei 10617, Taiwan*

<sup>2</sup>*School of Materials Science and Engineering,  
Nanyang Technological University, 50 Nanyang Avenue,  
Singapore 639798, Republic of Singapore*

<sup>3</sup>*Department of Chemistry, The Hong Kong University  
of Science and Technology, Hong Kong, China*

<sup>4</sup>*Center for Theoretical Physics, National Taiwan University, Taipei 10617, Taiwan*

<sup>5</sup>*Center for Quantum Science and Engineering,  
National Taiwan University, Taipei 10617, Taiwan*

---

\* Corresponding author. Electronic mail: haibinsu@ust.hk

† Corresponding author. Electronic mail: jdchai@phys.ntu.edu.tw

## LIST OF TABLES

|    |                                                                                                                                                                                                                                                                                                                                        |   |
|----|----------------------------------------------------------------------------------------------------------------------------------------------------------------------------------------------------------------------------------------------------------------------------------------------------------------------------------------|---|
| S1 | Comparison of the singlet-triplet energy gap $E_{ST}$ (in kcal/mol) of $n$ -coronene, calculated using spin-unrestricted TAO-LDA with the 6-31G(d) and 6-31G basis sets. ....                                                                                                                                                          | 3 |
| S2 | Singlet-triplet energy gap $E_{ST}$ (in kcal/mol) of $n$ -coronene, calculated using spin-unrestricted TAO-LDA, KS-LDA, and KS-B3LYP with the 6-31G basis set. Here, the experimental data is taken from the literature [1]. ....                                                                                                      | 4 |
| S3 | Vertical ionization potential $IP_v$ (in eV), vertical electron affinity $EA_v$ (in eV), and fundamental gap $E_g$ (in eV) for the lowest singlet state of $n$ -coronene, calculated using spin-unrestricted TAO-LDA with the 6-31G basis set. Here, the experimental data (given in parentheses) are taken from the literature [2–4]. | 5 |
| S4 | Symmetrized von Neumann entropy $S_{vN}$ for the lowest singlet state of $n$ -coronene, calculated using spin-restricted TAO-LDA with the 6-31G basis set. ....                                                                                                                                                                        | 6 |
| S5 | Active orbital occupation numbers (HOMO–8, ..., HOMO–1, HOMO, LUMO, LUMO+1, ..., and LUMO+8) for the lowest singlet state of $n$ -coronene, calculated using spin-restricted TAO-LDA with the 6-31G basis set. For brevity, HOMO is denoted as H, LUMO is denoted as L, and so on. .                                                   | 7 |

TABLE S1. Comparison of the singlet-triplet energy gap  $E_{\text{ST}}$  (in kcal/mol) of  $n$ -coronene, calculated using spin-unrestricted TAO-LDA with the 6-31G(d) and 6-31G basis sets.

| $n$ | 6-31G(d) | 6-31G | Difference |
|-----|----------|-------|------------|
| 2   | 51.31    | 52.41 | -1.10      |
| 3   | 30.05    | 30.81 | -0.76      |
| 4   | 17.68    | 18.16 | -0.48      |
| 5   | 9.96     | 10.21 | -0.25      |
| 6   | 5.49     | 5.59  | -0.10      |
| 7   | 3.18     | 3.21  | -0.03      |
| 8   | 2.02     | 2.03  | -0.01      |
| 9   | 1.41     | 1.40  | 0.01       |

TABLE S2. Singlet-triplet energy gap  $E_{\text{ST}}$  (in kcal/mol) of  $n$ -coronene, calculated using spin-unrestricted TAO-LDA, KS-LDA, and KS-B3LYP with the 6-31G basis set. Here, the experimental data is taken from the literature [1].

| $n$ | TAO-LDA | KS-LDA | KS-B3LYP | Expt.     |
|-----|---------|--------|----------|-----------|
| 2   | 52.41   | 60.21  | 61.10    | 55.35 [1] |
| 3   | 30.81   | 40.77  | 43.23    |           |
| 4   | 18.16   | 28.94  | 31.35    |           |
| 5   | 10.21   | 20.82  | 22.05    |           |
| 6   | 5.59    | 14.86  | 13.31    |           |
| 7   | 3.21    | 10.31  | 2.91     |           |
| 8   | 2.03    | 6.78   | -9.06    |           |
| 9   | 1.40    | 3.77   |          |           |
| 10  | 1.05    | 0.53   |          |           |
| 11  | 0.82    | 1.34   |          |           |

TABLE S3. Vertical ionization potential  $IP_v$  (in eV), vertical electron affinity  $EA_v$  (in eV), and fundamental gap  $E_g$  (in eV) for the lowest singlet state of  $n$ -coronene, calculated using spin-unrestricted TAO-LDA with the 6-31G basis set. Here, the experimental data (given in parentheses) are taken from the literature [2–4].

| $n$ | $IP_v$          | $EA_v$             | $E_g$             |
|-----|-----------------|--------------------|-------------------|
| 2   | 6.72 (7.29 [2]) | 0.58 (0.50 [3, 4]) | 6.14 (6.79 [2–4]) |
| 3   | 5.81            | 1.70               | 4.11              |
| 4   | 5.30            | 2.35               | 2.95              |
| 5   | 4.99            | 2.77               | 2.22              |
| 6   | 4.80            | 3.04               | 1.76              |
| 7   | 4.68            | 3.22               | 1.46              |
| 8   | 4.60            | 3.35               | 1.26              |
| 9   | 4.55            | 3.44               | 1.11              |
| 10  | 4.51            | 3.51               | 0.99              |
| 11  | 4.47            | 3.57               | 0.90              |

TABLE S4. Symmetrized von Neumann entropy  $S_{vN}$  for the lowest singlet state of  $n$ -coronene, calculated using spin-restricted TAO-LDA with the 6-31G basis set.

| $n$ | $S_{vN}$ |
|-----|----------|
| 2   | 0.01     |
| 3   | 0.15     |
| 4   | 0.54     |
| 5   | 1.29     |
| 6   | 2.39     |
| 7   | 3.77     |
| 8   | 5.30     |
| 9   | 6.93     |
| 10  | 8.65     |
| 11  | 10.44    |

TABLE S5. Active orbital occupation numbers (HOMO-8, ..., HOMO-1, HOMO, LUMO, LUMO+1, ..., and LUMO+8) for the lowest singlet state of  $n$ -coronene, calculated using spin-restricted TAO-LDA with the 6-31G basis set. For brevity, HOMO is denoted as H, LUMO is denoted as L, and so on.

| $n$ | 2     | 3     | 4     | 5     | 6     | 7     | 8     | 9     | 10    | 11    |
|-----|-------|-------|-------|-------|-------|-------|-------|-------|-------|-------|
| H-8 | 2.000 | 2.000 | 2.000 | 2.000 | 2.000 | 1.997 | 1.990 | 1.971 | 1.933 | 1.870 |
| H-7 | 2.000 | 2.000 | 2.000 | 1.999 | 1.996 | 1.987 | 1.965 | 1.927 | 1.869 | 1.791 |
| H-6 | 2.000 | 2.000 | 2.000 | 1.999 | 1.996 | 1.987 | 1.965 | 1.927 | 1.868 | 1.790 |
| H-5 | 2.000 | 2.000 | 2.000 | 1.999 | 1.992 | 1.970 | 1.917 | 1.828 | 1.707 | 1.574 |
| H-4 | 2.000 | 2.000 | 1.998 | 1.989 | 1.964 | 1.913 | 1.833 | 1.728 | 1.609 | 1.491 |
| H-3 | 2.000 | 2.000 | 1.998 | 1.989 | 1.964 | 1.913 | 1.832 | 1.727 | 1.608 | 1.490 |
| H-2 | 2.000 | 2.000 | 1.997 | 1.975 | 1.907 | 1.781 | 1.624 | 1.474 | 1.350 | 1.257 |
| H-1 | 1.999 | 1.988 | 1.948 | 1.865 | 1.743 | 1.602 | 1.467 | 1.353 | 1.264 | 1.198 |
| H   | 1.999 | 1.988 | 1.948 | 1.864 | 1.742 | 1.601 | 1.466 | 1.352 | 1.263 | 1.197 |
| L   | 0.001 | 0.012 | 0.052 | 0.136 | 0.262 | 0.411 | 0.557 | 0.685 | 0.787 | 0.863 |
| L+1 | 0.001 | 0.012 | 0.052 | 0.136 | 0.261 | 0.409 | 0.556 | 0.684 | 0.786 | 0.862 |
| L+2 | 0.000 | 0.000 | 0.003 | 0.025 | 0.097 | 0.234 | 0.408 | 0.578 | 0.719 | 0.823 |
| L+3 | 0.000 | 0.000 | 0.002 | 0.010 | 0.032 | 0.074 | 0.144 | 0.241 | 0.357 | 0.478 |
| L+4 | 0.000 | 0.000 | 0.002 | 0.010 | 0.031 | 0.074 | 0.144 | 0.240 | 0.356 | 0.477 |
| L+5 | 0.000 | 0.000 | 0.000 | 0.001 | 0.005 | 0.021 | 0.061 | 0.136 | 0.247 | 0.378 |
| L+6 | 0.000 | 0.000 | 0.000 | 0.001 | 0.004 | 0.012 | 0.031 | 0.065 | 0.117 | 0.189 |
| L+7 | 0.000 | 0.000 | 0.000 | 0.001 | 0.004 | 0.012 | 0.031 | 0.064 | 0.117 | 0.188 |
| L+8 | 0.000 | 0.000 | 0.000 | 0.000 | 0.001 | 0.002 | 0.007 | 0.022 | 0.052 | 0.104 |

- 
- [1] R. Abouaf and S. Diaz-Tenderoa, *Phys. Chem. Chem. Phys.*, 2009, **11**, 5686–5694.
- [2] G. Mallocci, C. Joblin, and G. Mulas, *Astron. Astrophys.*, 2007, **462**, 627–635.
- [3] M. A. Duncan *et al.*, *Chem. Phys. Lett.*, 1999, **309**, 49–54.
- [4] G. Chen, R. G. Cooks, E. Corpuz, and L. T. Scott, *J. Am. Soc. Mass Spectrosc.*, 1996, **7**, 619–627.
